# Supplementary material for: Evolution of gene knockout strains of E. coli reveal regulatory architectures governed by metabolism
Source: PubMed Central journal article supplement (PMC6143558; doi:10.1038/s41467-018-06219-9), 2018-09-18

# Supplementary Information

Laboratory evolution of gene knockout strains of *E. coli* reveal regulatory architectures that are governed by metabolism

McCloskey et al.

## Supplementary Figure 1

Innovative transcript levels vs. Fitness change. Innovative transcripts are those transcript profiles (Ref - uKO - eKO, see Fig. 3) that classify as Novel, Overcompensated, Reinforced, or Unrestored (p-value < 0.05). Fitness change is calculated as the average distance in % fitness change from Ref to uKO, and from uKO to eKO. Average counts for transcript levels and average % fitness change are shown as y- and x- axis, respectively. Pearson correlation coefficient and p-value are annotated on the plot.

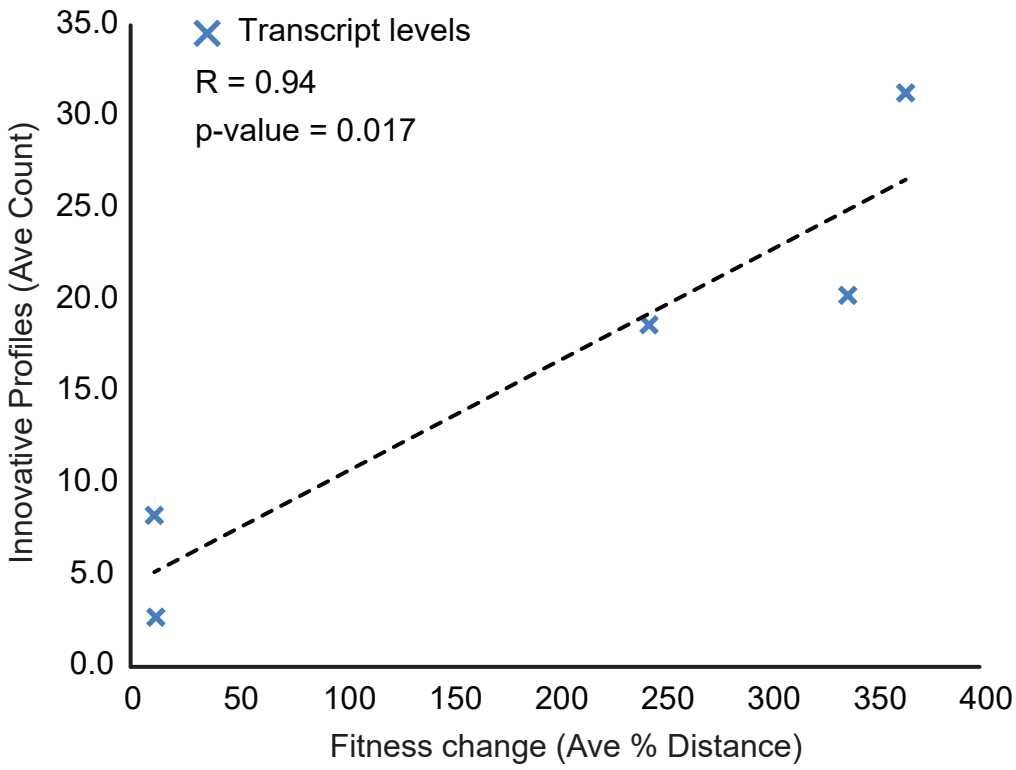

Supplement: 41467_2018_6219_MOESM1_ESM.pdf [file 41467_2018_6219_MOESM1_ESM.pdf]
